# Supplementary material for: Structural Consensus among Antibodies Defines the Antigen Binding Site
Source: PLOS journal article supplement (doi:10.1371/journal.pcbi.1002388), 2012-02-23
Supplement: S4 (10.1371/journal.pcbi.1002388.s004) [file journal.pcbi.1002388.s004]

ABR L2 (i.e. LLIYRDRRRPS) of PDB ID 2xqb was the only ABR for which off-CDRs residues were found. To examine the effect of mutating to Alanine the off-CDRs residues on the binding energy, and thus on the stability of the Ab-Ag complex, we performed an in-silico single-point mutations analysis using the FoldX algorithm (see Methods), to L2 ABR residues. Table S2 shows the results of mutating L2 ABR residues to Alanine on the binding energy ( $\Delta\Delta G$ ) between the Ab and the Ag.

**Table 2S. The effect of mutating ABR L2 Ab binding residues to Alanine on the binding energy.**

| <b>Ab residue</b> | <b><math>\Delta\Delta G</math></b> | <b>Effect of mutation</b> |
|-------------------|------------------------------------|---------------------------|
| <b>LEU46</b>      | <b>0.32</b>                        | <b>NEUTRAL</b>            |
| LEU47             | 0                                  | NEUTRAL                   |
| ILE48             | -0.04                              | NEUTRAL                   |
| <b>TYR49</b>      | <b>2.59</b>                        | <b>DESTABILIZING</b>      |
| <b>ARG50</b>      | <b>3.77</b>                        | <b>DESTABILIZING</b>      |
| ASP51             | -0.18                              | NEUTRAL                   |
| ARG52             | 0.35                               | DESTABILIZING             |
| <b>ARG53</b>      | <b>1.71</b>                        | <b>DESTABILIZING</b>      |
| ARG54             | 0.36                               | DESTABILIZING             |
| PRO55             | 0.34                               | DESTABILIZING             |
| SER56             | 0.31                               | DESTABILIZING             |
