# Supplementary material for: Structural Consensus among Antibodies Defines the Antigen Binding Site
Source: PLOS journal article supplement (doi:10.1371/journal.pcbi.1002388), 2012-02-23
Supplement: S11 (10.1371/journal.pcbi.1002388.s011) [file journal.pcbi.1002388.s011]

To find out from which ABR/CDR Paratome-unique Ag binding residues originate from, we computed the percentage of residues originating from each ABR/CDR (i.e. L1-3, H1-3). To gain additional insight into the differences between the Ag binding residues identified by Paratome and the various CDR identification methods, we computed for each method its own Paratome-unique set of Ag binding regions. For instance, Paratome-Kabat unique is the set of all Ag binding residues identified by Paratome yet not identified by Kabat. Table S9 depicts the results. The CDRs from which residues that are not identified by the commonly used CDR identification methods originate:

**Table 9S. The percentage of Paratome-unique residues for each ABR/CDR.**

| <b>ABR/CDR</b> | <b>Paratome-unique</b> | <b>Paratome-Kabat unique</b> | <b>Paratome-Chothia unique</b> | <b>Paratome-IMGT unique</b> |
|----------------|------------------------|------------------------------|--------------------------------|-----------------------------|
| <b>L1</b>      | –                      | –                            | –                              | 7.4%                        |
| <b>L2</b>      | 64.7%                  | 24.3%                        | 11.05%                         | 29.2%                       |
| <b>L3</b>      | –                      | –                            | –                              | –                           |
| <b>H1</b>      | –                      | 48.45%                       | 29.7%                          | 18%                         |
| <b>H2</b>      | 35.3%                  | 13.15%                       | 52.95%                         | 45.4%                       |
| <b>H3</b>      | –                      | 14.1%                        | 6.3%                           | –                           |
